# Supplementary material for: Multivalent Allylammonium-Based Cross-Linkers for the Synthesis of Homogeneous, Highly Swelling Diallyldimethylammonium Chloride Hydrogels
Source: MDPI journal article supplement (doi:10.3390/gels8020100), 2022-02-08
Supplement: s1 [file s1]

## Supplementary Materials:

To

### Multivalent ammonium bromide based crosslinkers for the synthesis of diallyldimethylammonium chloride hydrogels

Tim Mrohs <sup>1</sup> and Oliver Weichold<sup>2,\*</sup>

<sup>1</sup> Institute of Building Materials Research, RWTH Aachen University, Schinkelstraße 3, 52062 Aachen, Germany.

\* Correspondence: weichold@ibac.rwth-aachen.de

**Table S-1:** Details on the sample composition used to prepare crosslinked DADMAC hydrogels.

| Sample    | Type | Crosslinker   |          |        | Stirring time / min |
|-----------|------|---------------|----------|--------|---------------------|
|           |      | ratio / mol-% | n / mmol | m / mg |                     |
| BIS0,25   | BIS  | 0,25          | 0,05     | 7,8    | 10                  |
| BIS0,5    | BIS  | 0,5           | 0,1      | 15,5   | 10                  |
| BIS1      | BIS  | 1             | 0,2      | 31     | 5                   |
| BIS2      | BIS  | 2             | 0,4      | 62     | 5                   |
| BIS3      | BIS  | 3             | 0,6      | 93     | 1                   |
| BIS4      | BIS  | 4             | 0,8      | 124    | 1                   |
| BIS5      | BIS  | 5             | 1        | 155    | 1                   |
| TAAB0,25  | TAB  | 0,25          | 0,05     | 13     | 10                  |
| TAAB0,5   | TAB  | 0,5           | 0,1      | 26     | 10                  |
| TAAB1     | TAB  | 1             | 0,2      | 51,9   | 10                  |
| TAAB2     | TAB  | 2             | 0,4      | 103,2  | 10                  |
| TAAB3     | TAB  | 3             | 0,6      | 155,7  | 10                  |
| TAAB4     | TAB  | 4             | 0,8      | 207,6  | 10                  |
| TAAB5     | TAB  | 5             | 1        | 259,5  | 10                  |
| TAAB6     | TAB  | 6             | 1,2      | 311,4  | 10                  |
| TAAB7     | TAB  | 7             | 1,4      | 363,3  | 10                  |
| TAPB0,25  | TAP  | 0,25          | 0,05     | 20,5   | 10                  |
| TAPB0,5   | TAP  | 0,5           | 0,1      | 41,1   | 10                  |
| TAPB1     | TAP  | 1             | 0,2      | 81,2   | 10                  |
| TAPB2     | TAP  | 2             | 0,4      | 162,4  | 10                  |
| TAPB3     | TAP  | 3             | 0,6      | 243,6  | 5                   |
| TAPB4     | TAP  | 4             | 0,8      | 324,8  | 5                   |
| TAPB5     | TAP  | 5             | 1        | 406,0  | 5                   |
| TAPB6     | TAP  | 6             | 1,2      | 487,2  | 5                   |
| TAPB7     | TAP  | 7             | 1,4      | 568,4  | 5                   |
| TAMPB0,25 | TAMP | 0,25          | 0,05     | 26,8   | 10                  |
| TAMPB0,5  | TAMP | 0,5           | 0,1      | 53,7   | 10                  |
| TAMPB1    | TAMP | 1             | 0,2      | 107,3  | 10                  |
| TAMPB2    | TAMP | 2             | 0,4      | 214,6  | 10                  |
| TAMPB3    | TAMP | 3             | 0,6      | 321,9  | 10                  |
| TAMPB4    | TAMP | 4             | 0,8      | 429,2  | 10                  |
| TAMPB5    | TAMP | 5             | 1        | 536,5  | 10                  |
| TAMPB6    | TAMP | 6             | 1,2      | 643,8  | 10                  |
| TAMPB7    | TAMP | 7             | 1,4      | 751,1  | 10                  |

**Table S-2:** Details on the determination of the gelation points of crosslinked DADMAC hydrogels.

| Sample | Crosslinker |               |                     |                        | Recorded gel Point <sup>[a]</sup> / min |
|--------|-------------|---------------|---------------------|------------------------|-----------------------------------------|
|        | Type        | ratio / mol-% | Stirring time / min | Preparation time / min |                                         |
| 1      | BIS         | 1             | 5                   | 1                      | 7,7                                     |
| 2      | BIS         | 2             | 5                   | 1                      | 1,6                                     |
| 3      | BIS         | 3             | 1                   | 1                      | 2,7                                     |
| 4      | BIS         | 4             | 1                   | 1                      | 1,4                                     |
| 5      | TAPB        | 1             | 10                  | 1                      | 85                                      |
| 6      | TAPB        | 2             | 10                  | 1                      | 11                                      |
| 7      | TAPB        | 3             | 5                   | 1                      | 12                                      |
| 8      | TAPB        | 5             | 5                   | 1                      | 8,5                                     |
| 9      | TAMPB       | 1             | 10                  | 1                      | 124                                     |
| 10     | TAMPB       | 2             | 10                  | 1                      | 110                                     |
| 11     | TAMPB       | 3             | 10                  | 1                      | 87                                      |
| 12     | TAMPB       | 5             | 10                  | 1                      | 48                                      |
| 13     | TAAB        | 1             | 10                  | 1                      | 1740                                    |
| 14     | TAAB        | 2             | 10                  | 1                      | 1170                                    |
| 15     | TAAB        | 3             | 10                  | 1                      | 340                                     |
| 16     | TAAB        | 5             | 10                  | 1                      | 69                                      |

<sup>[a]</sup> The recorded gel points were taken graphically from the plotted values of the storage ( $G'$ ) and loss ( $G''$ ) modulus against time. Data points were taken every 10 seconds. The time at which the values of  $G' > G''$  remained was determined as the value for the gel point by adding the stirring and transfer time, exemplarily shown in figure.S1.

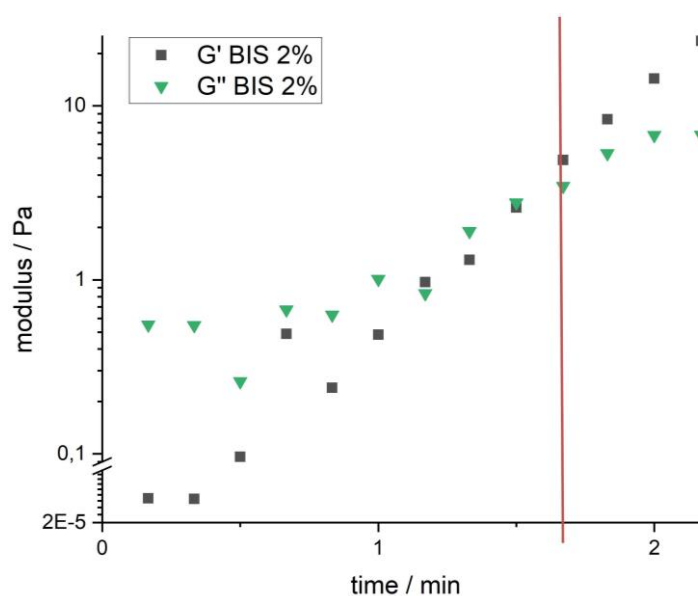

**Figure S1.** Example of the rheological determination of  $G'$  and  $G''$  of a DADMAC gelation mixture with 2 mol-% BIS for the graphical determination of the gel point. The real gel point (7.6 min) results from the read gel point (1.6 min) + stirring time (5 min) + preparation time (1 min).

## Tetraallyl ammonium bromide (TAAB)

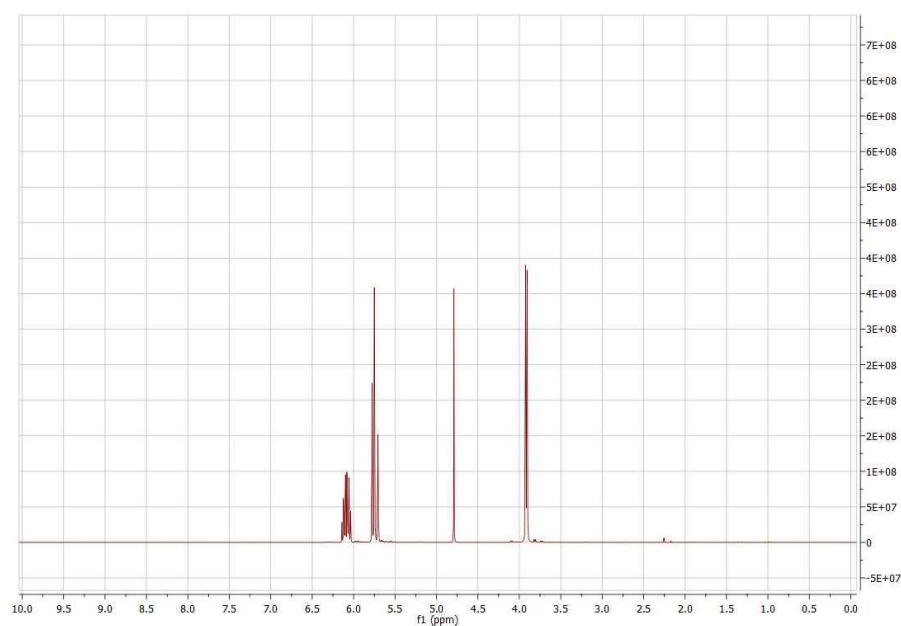

**Figure S2.**  $^1\text{H}$ -NMR-spectrum (400 MHz,  $\text{D}_2\text{O}$ ) of Tetraallyl ammonium bromide (TAAB).

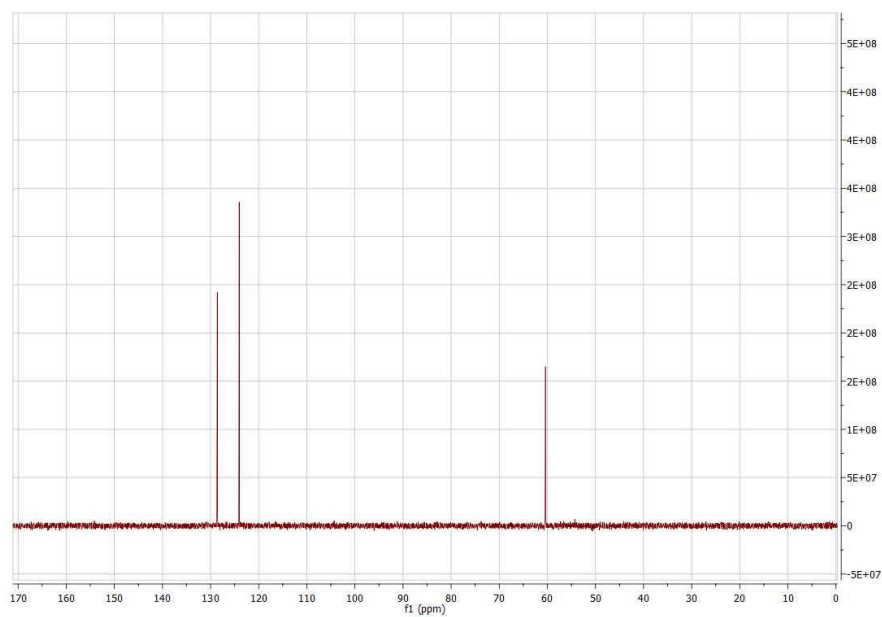

**Figure S3.**  $^{13}\text{C}$ -NMR-spectrum (400 MHz,  $\text{D}_2\text{O}$ ) of Tetraallyl ammonium bromide (TAAB).

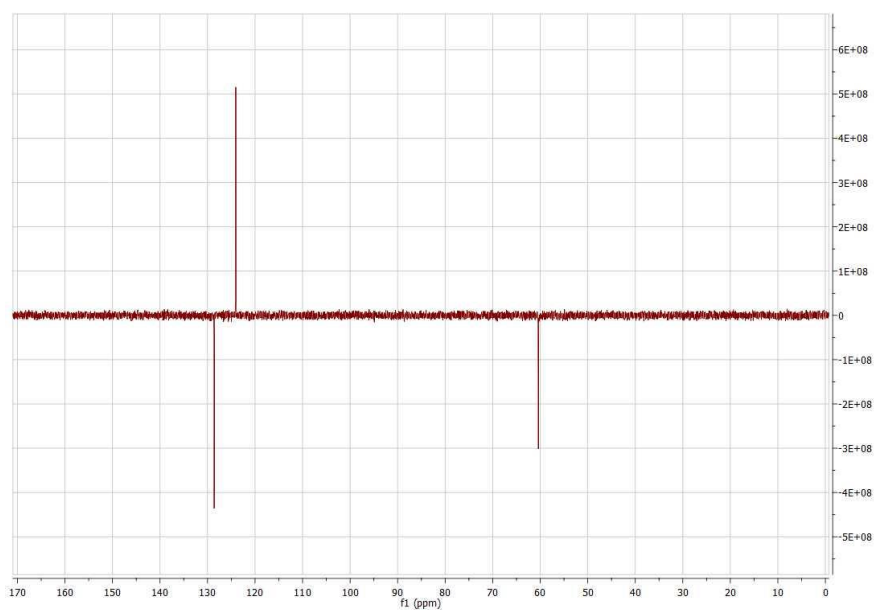

**Figure S4.**  $^{13}\text{C}$ -NMR-APT-spectrum (400 MHz,  $\text{D}_2\text{O}$ ) of Tetraallyl ammonium bromide (TAAB).

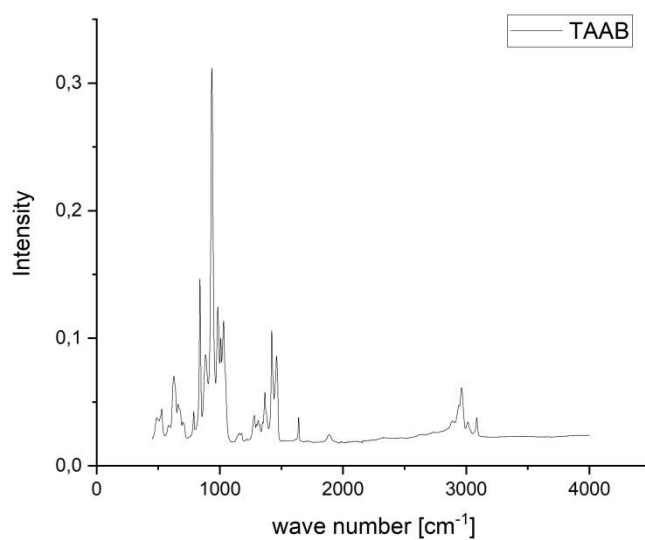

**Figure S5.** ATR-IR-spectrum of Tetraallyl ammonium bromide (TAAB).

***N,N'*-diallyl piperazine (DAP)**

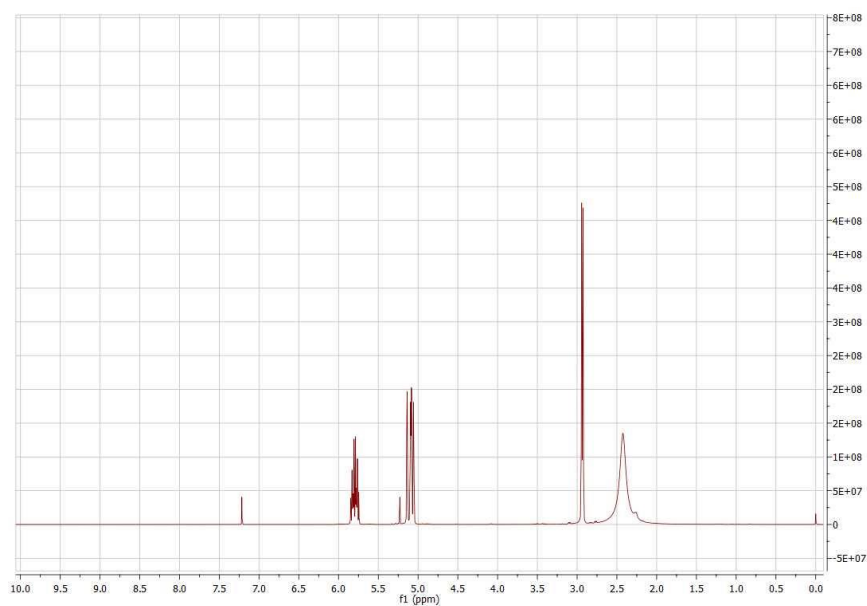

**Figure S6.** <sup>1</sup>H-NMR-spectrum (400 MHz, CDCl<sub>3</sub>) of *N,N'*-diallyl piperazine (DAP).

***N,N,N',N'*-tetraallyl piperazinium dibromide (TAPB)**

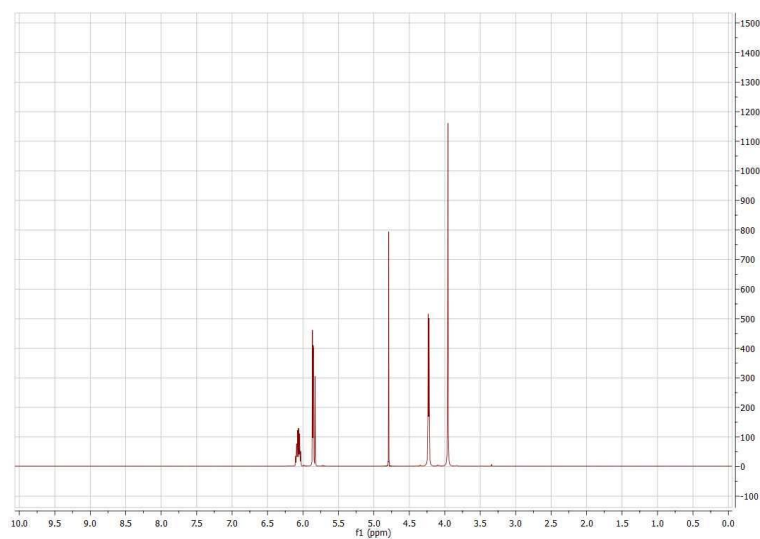

**Figure S7.** <sup>1</sup>H-NMR-spectrum (400 MHz, D<sub>2</sub>O) of *N,N,N',N'*-tetraallyl piperazinium dibromide (TAPB).

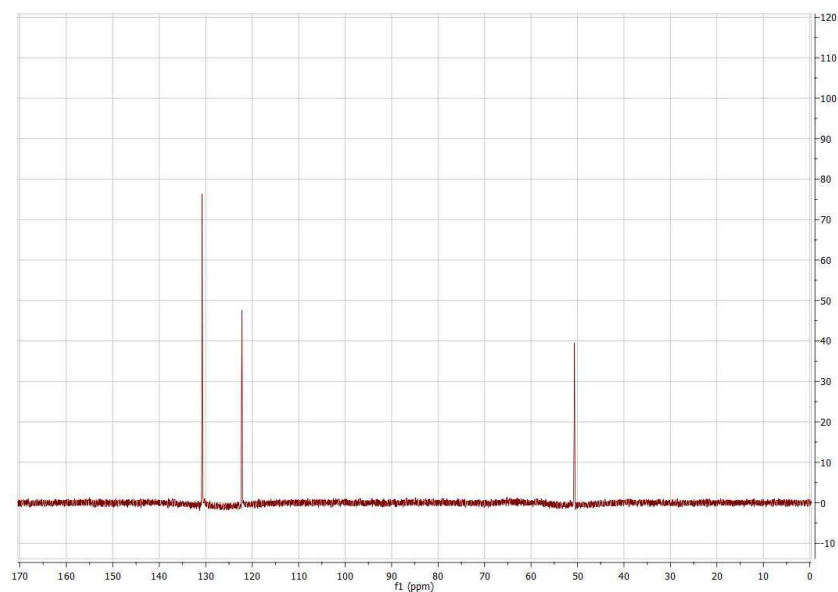

**Figure S8.**  $^{13}\text{C}$ -NMR-spectrum (400 MHz,  $\text{D}_2\text{O}$ ) of  $N,N,N',N'$ -tetraallyl piperazinium dibromide (TAPB).

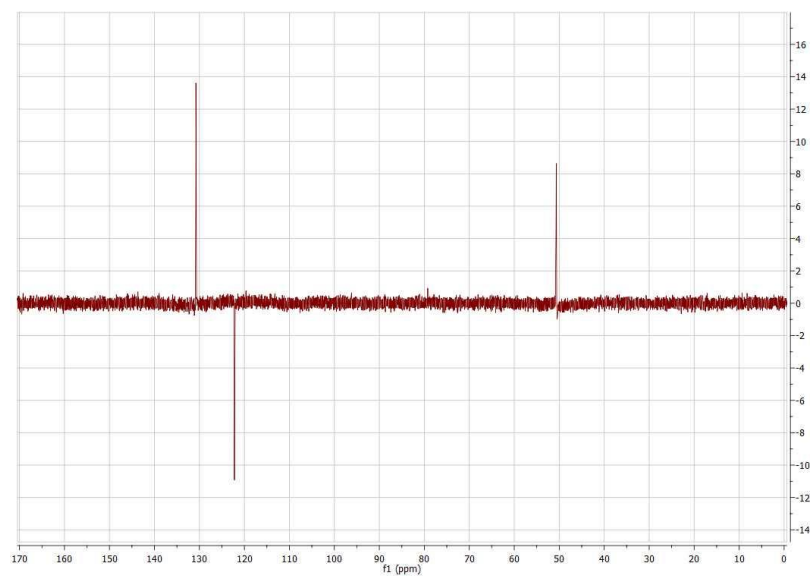

**Figure S9.**  $^{13}\text{C}$ -NMR-APT-spectrum (400 MHz,  $\text{D}_2\text{O}$ ) of  $N,N,N',N'$ -tetraallyl piperazinium dibromide (TAPB).

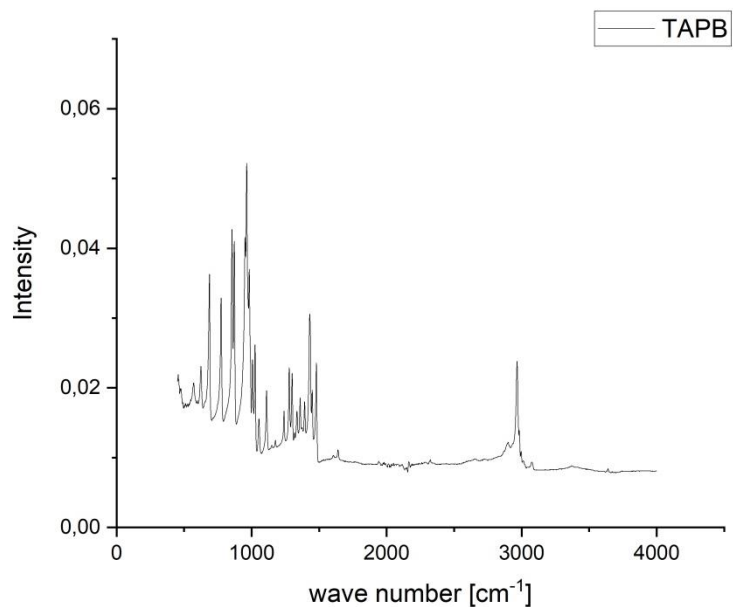

**Figure S10.** ATR-IR-spectrum of *N,N,N',N'*-tetraallyl piperazinium dibromide (TAPB).

### *N,N'*-diallyl trimethylene dipiperidine (DAMP)

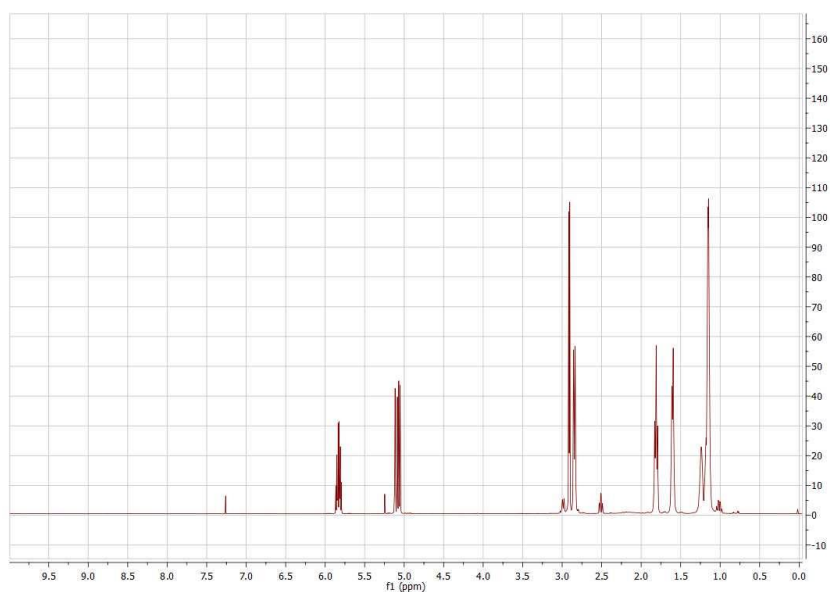

**Figure S11.** <sup>1</sup>H-NMR-spectrum (400 MHz, CDCl<sub>3</sub>) of *N,N'*-diallyl trimethylene dipiperidine (DAMP).

***N,N,N',N'*-tetraallyl trimethylene dipiperidine dibromide(TAMPB)**

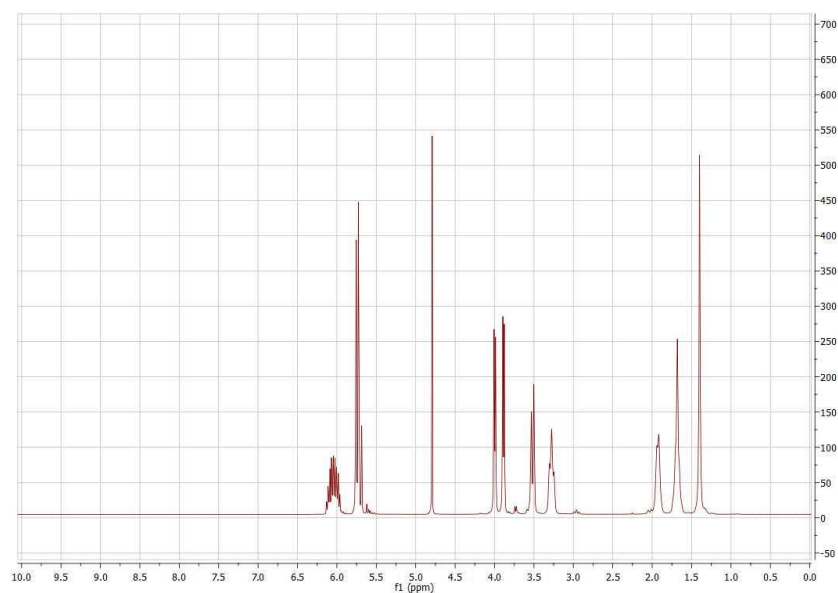

**Figure S12.**  $^1\text{H}$ -NMR-spectrum (400 MHz,  $\text{D}_2\text{O}$ ) of *N,N,N',N'*-tetraallyl trimethylene dipiperidine dibromide(TAMPB).

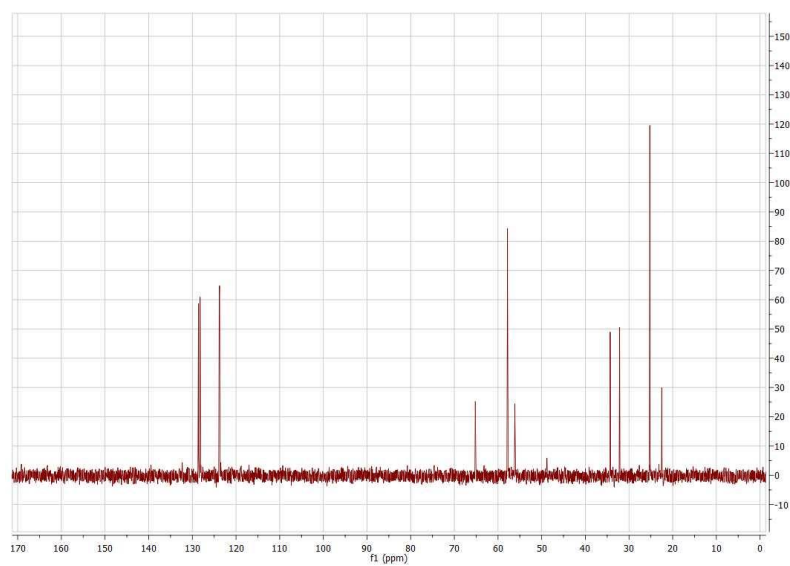

**Figure S13.**  $^{13}\text{C}$ -NMR-spectrum (400 MHz,  $\text{D}_2\text{O}$ ) of *N,N,N',N'*-tetraallyl trimethylene dipiperidine dibromide(TAMPB).



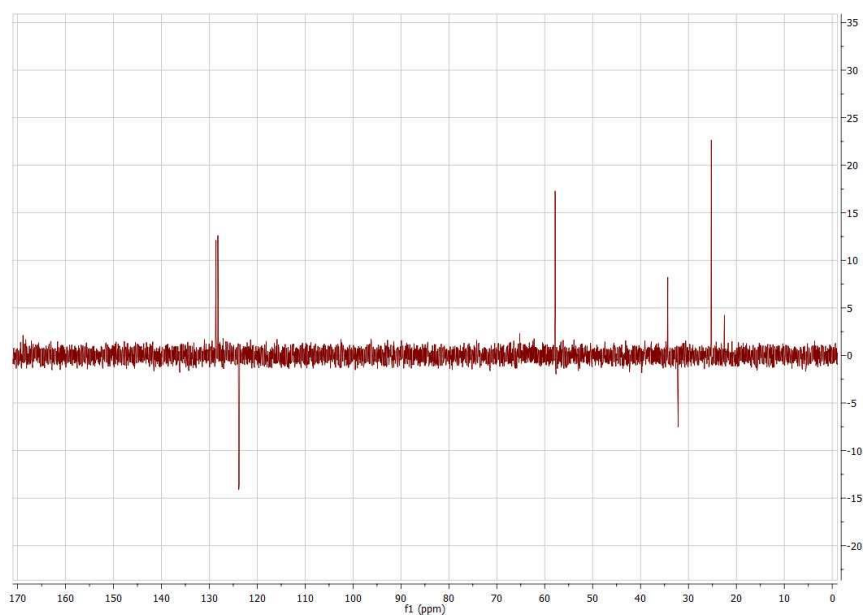

**Figure S14.**  $^{13}\text{C}$ -NMR-APT-spectrum (400 MHz,  $\text{D}_2\text{O}$ ) of *N,N,N',N'*-tetraallyl trimethylene dipiperidine dibromide(TAMPB).

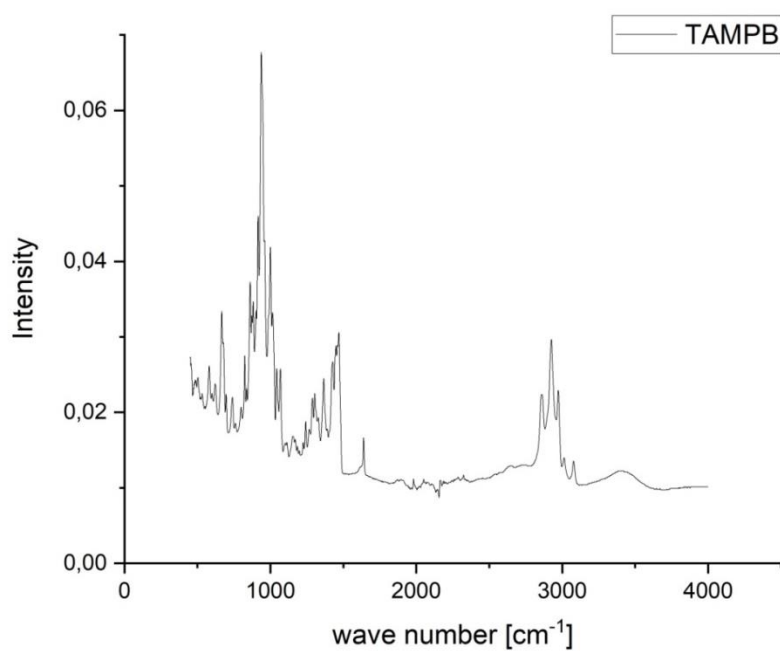

**Figure S15.** ATR-IR-spectrum of *N,N,N',N'*-tetraallyl trimethylene dipiperidine dibromide(TAMPB).

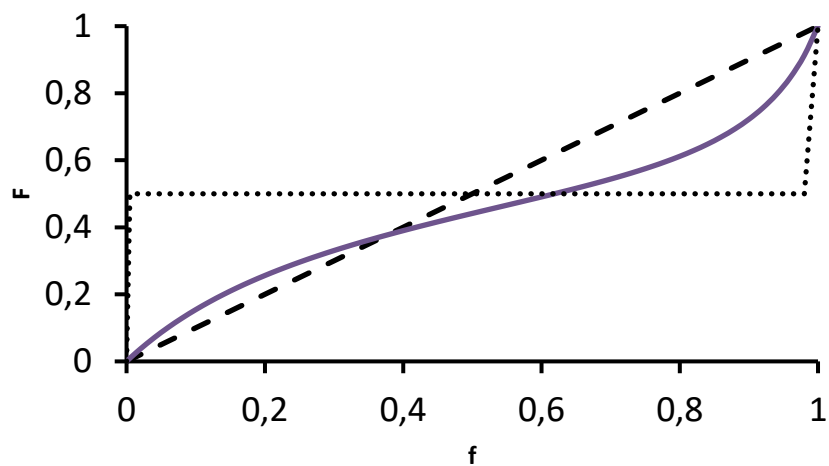

**Figure S16.** Copolymerisation diagram of poly(DADMAC-co- *N,N'*-Methylenebisacrylamide) calculated according to ALFREY and PRICE.

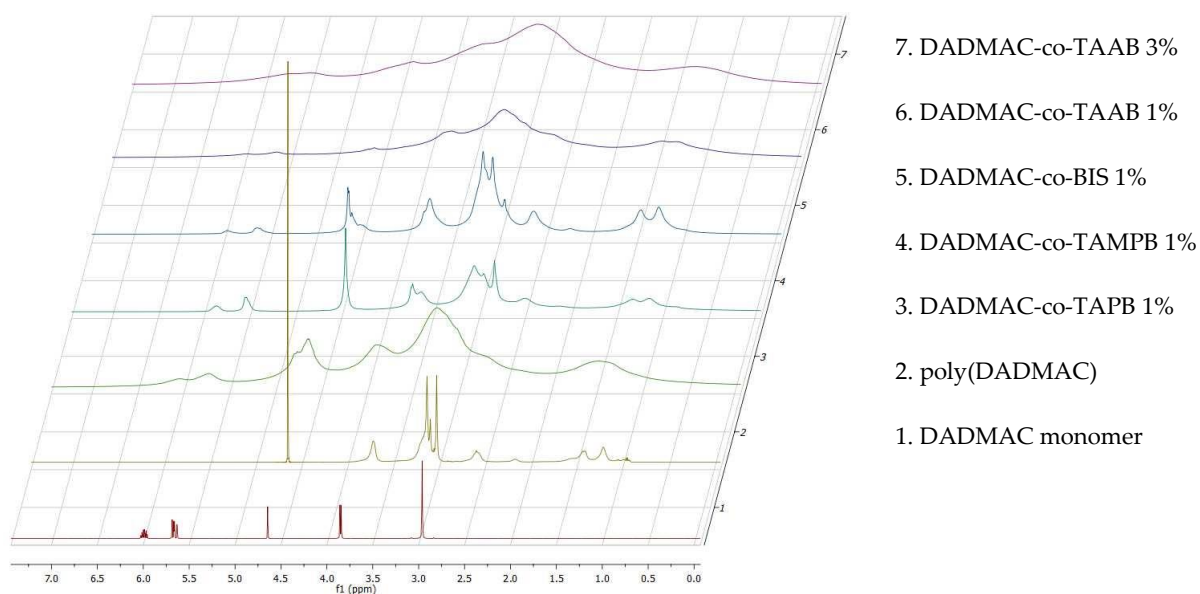

**Figure S17.**  $^1\text{H}$ -NMR-spectra (400 MHz,  $\text{D}_2\text{O}$ ) of 1) DADMAC Monomer, 2) poly(DADMAC), 3) DADMAC-co-TAPB (1 mol-% crosslinker), 4) DADMAC-co-TAMPB (1 mol-% crosslinker), 5) DADMAC-co-BIS (1 mol-% crosslinker), 6) DADMAC-co-TAAB (1 mol-% crosslinker), 7) DADMAC-co-TAAB (3 mol-% crosslinker) pre-swollen in  $\text{D}_2\text{O}$ .

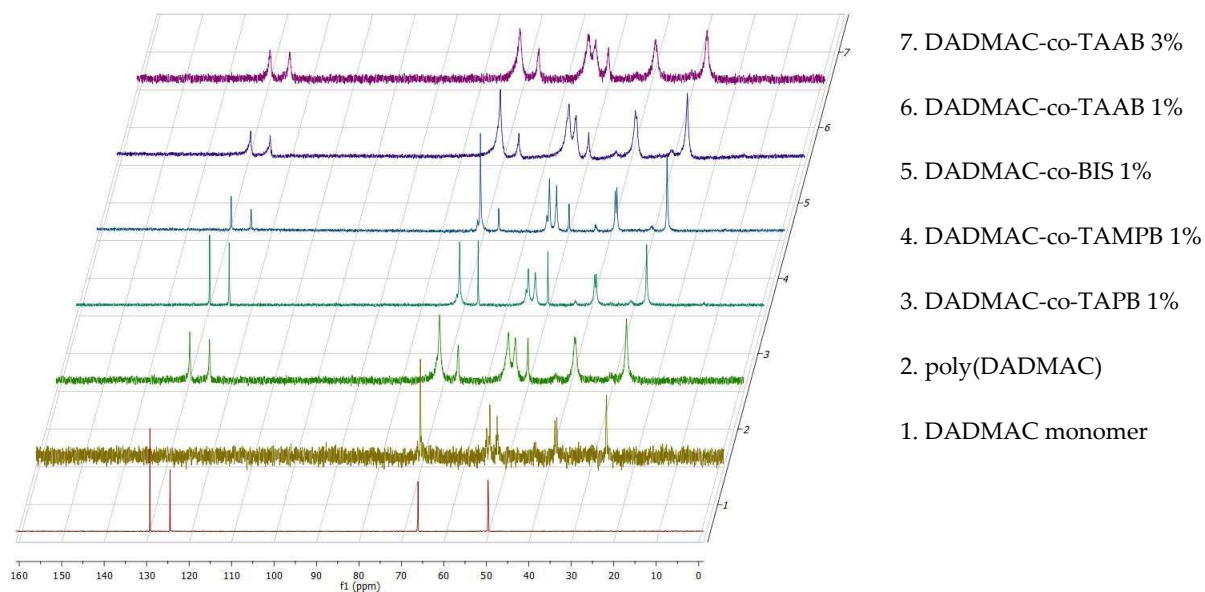

**Figure S18.**  $^{13}\text{C}$ -NMR-spectra(400 MHz,  $\text{D}_2\text{O}$ ) of 1) DADMAC Monomer, 2) poly(DADMAC), 3) DADMAC-co-TAPB (1 mol-% crosslinker), 4) DADMAC-co-TAMPB (1 mol-% crosslinker), 5) DADMAC-co-BIS (1 mol-% crosslinker), 6) DADMAC-co-TAAB (1 mol-% crosslinker), 7) DADMAC-co-TAAB (3 mol-% crosslinker) pre-swollen in  $\text{D}_2\text{O}$ .

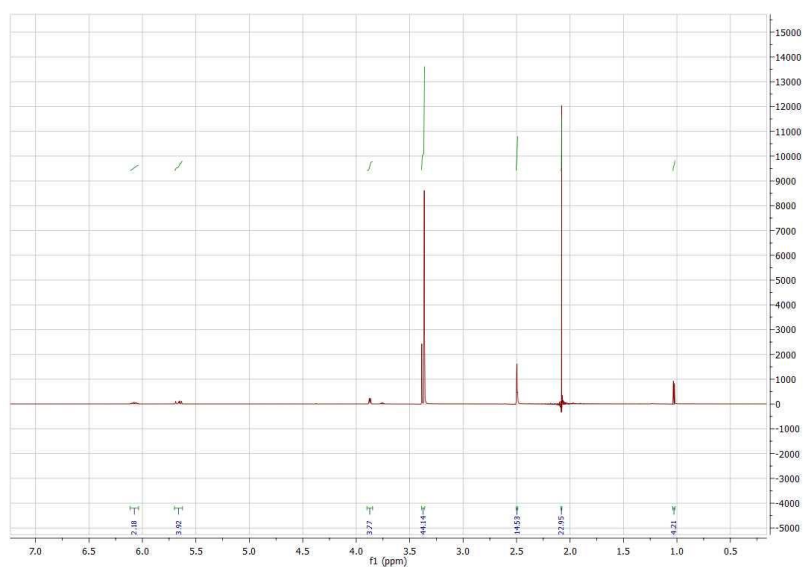

**Figure S19.**  $^1\text{H}$ -NMR-spectrum (400 MHz,  $\text{D}_2\text{O}$ ) of Poly-tetraallyl ammonium bromide (pTAAB).

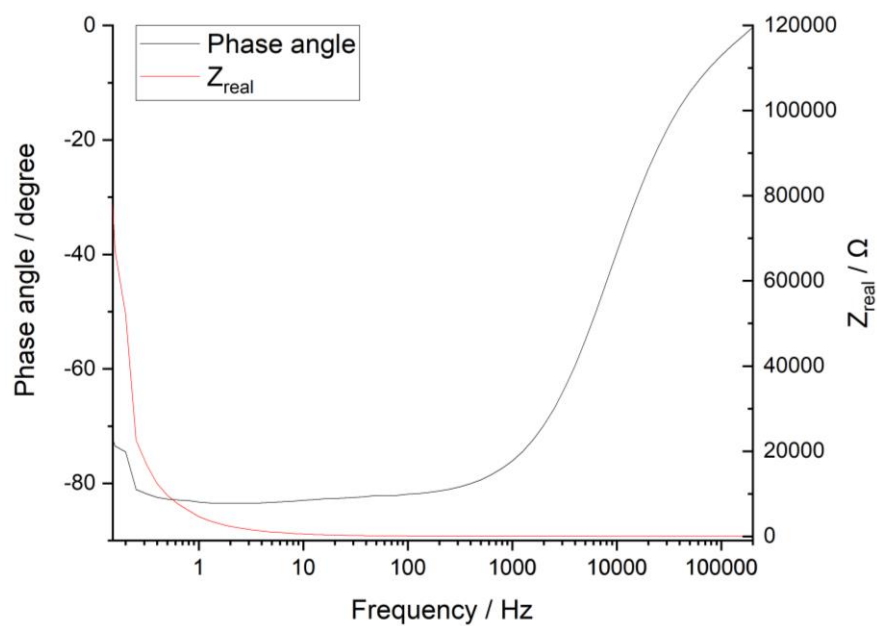

**Figure S20.** Exemplary bodeplot of a DADMAC gelation mixture with 1 mol-% TAMPB after 10 hours of polymerisation.

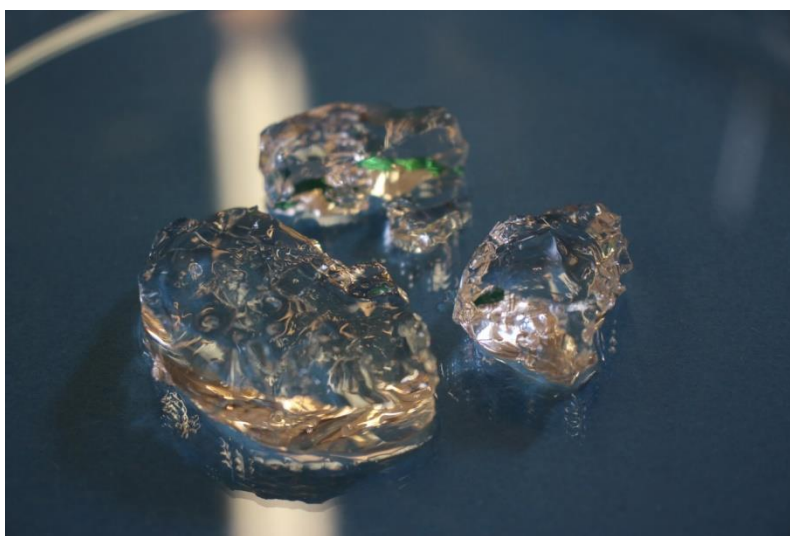

**Figure S21.** Poly(DADMAOH) crosslinked with 1%w.t. BIS and swollen in double distilled Water.
